# Supplementary material
Source: PubMed Central journal article supplement (PMC6238757)
Supplement: jciinsight-3-97677-s069.pdf [file jciinsight-3-97677-s069.pdf]

| patient           | gender | age | diagnosis | time to injury | site                | outcome           |
|-------------------|--------|-----|-----------|----------------|---------------------|-------------------|
| <b>ctrl</b>       |        |     |           |                |                     |                   |
| 1                 | male   | 32  | epilepsy  | —              | right temporal lobe | no disability     |
| 2                 | male   | 24  | epilepsy  | —              | right temporal lobe | no disability     |
| 3                 | male   | 56  | epilepsy  | —              | left temporal lobe  | mild disability   |
| 4                 | male   | 53  | epilepsy  | —              | left temporal lobe  | no disability     |
| 5                 | male   | 58  | epilepsy  | —              | right temporal lobe | no disability     |
| <b>TBI &lt;6h</b> |        |     |           |                |                     |                   |
| 1                 | male   | 54  | TBI       | 6h             | left frontal lobe   | severe disability |
| 2                 | male   | 28  | TBI       | 5h             | right frontal lobe  | mild disability   |
| 3                 | male   | 66  | TBI       | 6h             | right frontal lobe  | death             |
| 4                 | male   | 52  | TBI       | 5h             | right frontal lobe  | mild disability   |
| 5                 | male   | 45  | TBI       | 4h             | left frontal lobe   | mild disability   |
| <b>TBI 48-72h</b> |        |     |           |                |                     |                   |
| 1                 | male   | 68  | TBI       | 51h            | left frontal lobe   | death             |
| 2                 | male   | 63  | TBI       | 49h            | right frontal lobe  | severe disability |
| 3                 | male   | 67  | TBI       | 65h            | right temporal lobe | death             |
| 4                 | male   | 56  | TBI       | 58h            | left temporal lobe  | mild disability   |
| 5                 | male   | 49  | TBI       | 66h            | right temporal lobe | mild disability   |

**Supplementary Table 1.** Demographic and clinical parameters of control and TBI patients. ctrl, control; TBI, traumatic brain injury; h, hour.

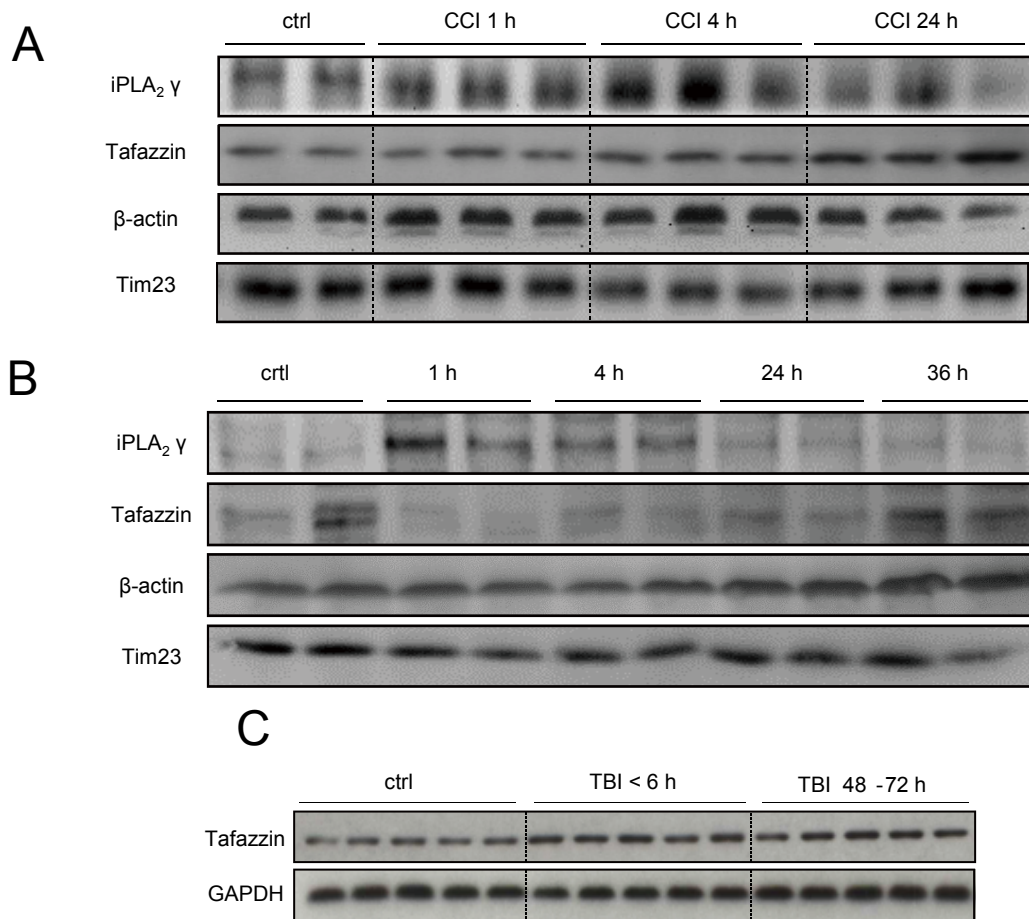

**Supplementary Figure 1.** (A) Representative blot (out of 5) showing expression levels of cardiolipin remodeling proteins after CCI in contusional cortex. (B) Temporal profile of changes in cardiolipin remodeling proteins, after mechanical stretch in HT22 cells. (C) Changes in tafazzin expression in human contusional brain tissue for TBI patients who underwent resection of contusion within 6 hours or 48-72 hours after TBI.

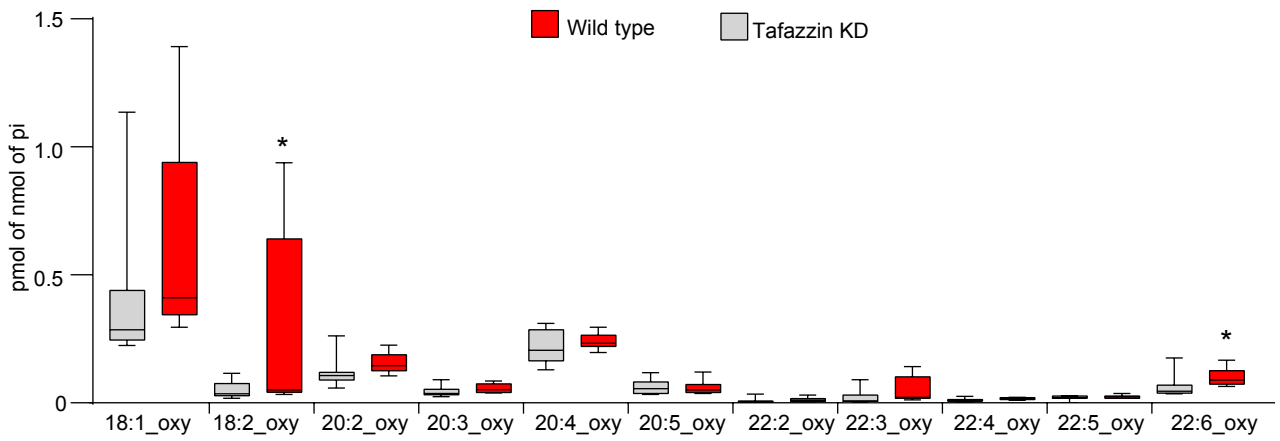

**Supplementary Figure 2.** Changes in oxidized FFA in wild type and tafazzin knockdown mice. n = 8/ group \*p<0.05 vs. WT.

**A**

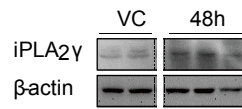

**B**

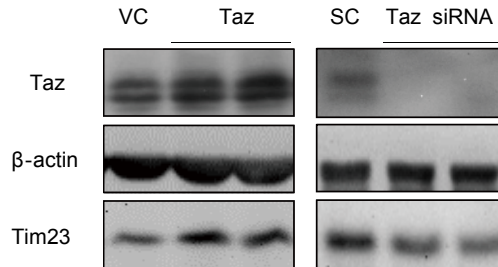

**Supplementary Figure 3. (A)** Assessment of Calcium-independent phospholipase A<sub>2</sub> (iPLA<sub>2</sub>γ) after transient transfection with (iPLA<sub>2</sub>γ) plasmid. **(B)** Tafazzin levels assessed by western blot after overexpression (left) or knock down

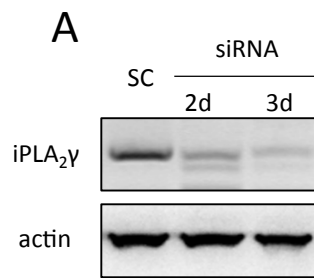

**Supplementary Figure 4.** Assessment of Calcium-independent phospholipase A<sub>2</sub> (iPLA<sub>2</sub> $\gamma$ ) on 2 and 3 days after intraventricular microinjection in rat brain.

## Hippocampus

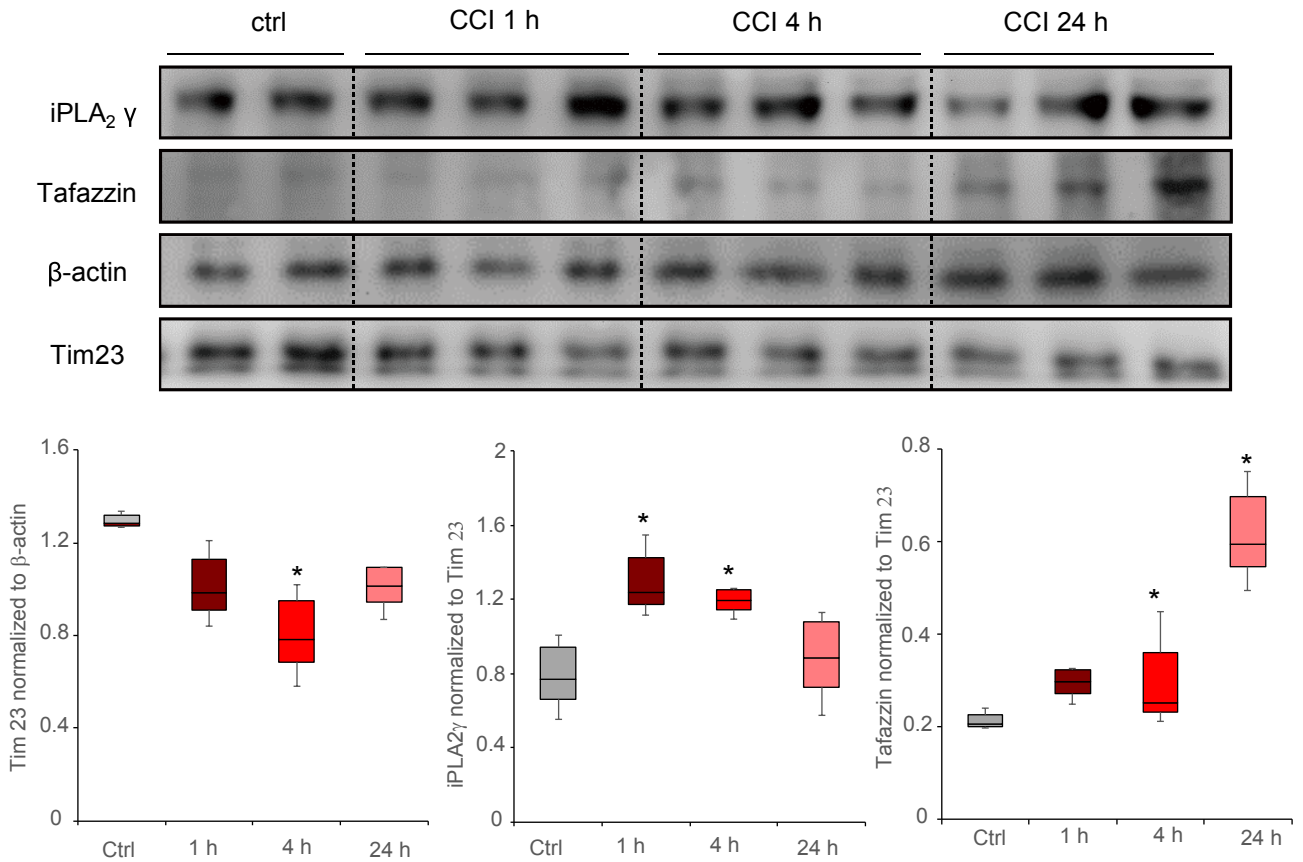

**Supplementary Figure 5.** Expression of cardiolipin remodeling pathway proteins (relative to β-actin or mitochondrial marker Tim23) after CCI in ipsilateral (left) hippocampus. n = 3/group, \*p < 0.05 vs. control (ctrl).
